# Supplementary material
Source: PubMed Central journal article supplement (PMC4004780)
Supplement: me-14-1006.pdf [file me-14-1006.pdf]

1 **Supplementary Tables**

2 **Supplementary Table 1. Comparisons of EPSLiM models with different underlying methods.** The  
 3 Area Under the Receiver Operating Characteristic (AUROC) Curves for EPSLiM models with different  
 4 combinations of individual predictors integrated. Included predictors are designated with a 1 and excluded  
 5 predictors are designated with a 0. The final EPSLiM model is the first row in the table with the highest  
 6 score and is represented in Figures 2 & 3.

| CM-ANCHOR | MoRFpred | ANCHOR   | SLiMPred | SLiMPrints | AUROC         |
|-----------|----------|----------|----------|------------|---------------|
| <i>1</i>  | <i>1</i> | <i>0</i> | <i>1</i> | <i>1</i>   | <i>0.8364</i> |
| 1         | 1        | 1        | 1        | 1          | 0.8356        |
| 1         | 0        | 1        | 1        | 1          | 0.8309        |
| 1         | 0        | 0        | 1        | 1          | 0.8279        |
| 1         | 1        | 0        | 1        | 0          | 0.8194        |
| 1         | 1        | 1        | 1        | 0          | 0.8190        |
| 0         | 0        | 1        | 1        | 1          | 0.8128        |
| 1         | 0        | 1        | 1        | 0          | 0.8106        |
| 0         | 0        | 0        | 1        | 1          | 0.8104        |
| 0         | 1        | 1        | 1        | 1          | 0.8080        |
| 1         | 0        | 0        | 1        | 0          | 0.8061        |
| 0         | 1        | 0        | 1        | 1          | 0.8038        |
| 1         | 1        | 1        | 0        | 1          | 0.7935        |
| 1         | 1        | 0        | 0        | 1          | 0.7928        |
| 0         | 0        | 1        | 1        | 0          | 0.7835        |
| 0         | 0        | 0        | 1        | 0          | 0.7802        |
| 0         | 1        | 1        | 1        | 0          | 0.7795        |
| 1         | 0        | 1        | 0        | 1          | 0.7752        |
| 0         | 1        | 0        | 1        | 0          | 0.7722        |
| 1         | 1        | 1        | 0        | 0          | 0.7679        |
| 1         | 1        | 0        | 0        | 0          | 0.7669        |
| 1         | 0        | 0        | 0        | 1          | 0.7522        |
| 0         | 1        | 1        | 0        | 1          | 0.7399        |
| 1         | 0        | 1        | 0        | 0          | 0.7365        |

|   |   |   |   |   |        |
|---|---|---|---|---|--------|
| 0 | 0 | 1 | 0 | 1 | 0.7363 |
| 0 | 1 | 0 | 0 | 1 | 0.7255 |
| 1 | 0 | 0 | 0 | 0 | 0.7036 |
| 0 | 1 | 1 | 0 | 0 | 0.6911 |
| 0 | 0 | 1 | 0 | 0 | 0.6764 |
| 0 | 1 | 0 | 0 | 0 | 0.6659 |
| 0 | 0 | 0 | 0 | 1 | 0.6209 |

7

8

9 **Supplementary Table 2. Performance evaluation for SLiM predictors.** The true positive rates for  
 10 Short Linear Motif (SLiM) predictors are reported for individual predictors at the specified false positive  
 11 rate.

|                     | True Positive Rate |     |     |     |     |     |     |     |     |     |     | AUROC  |
|---------------------|--------------------|-----|-----|-----|-----|-----|-----|-----|-----|-----|-----|--------|
| EPSLiM              | 43%                | 44% | 58% | 65% | 71% | 76% | 80% | 83% | 86% | 89% | 90% | 0.8364 |
| ANCHOR              | 17%                | 18% | 28% | 33% | 42% | 49% | 55% | 60% | 65% | 69% | 73% | 0.6764 |
| CM-ANCHOR           | 9%                 | 10% | 23% | 36% | 42% | 51% | 59% | 66% | 71% | 77% | 81% | 0.7036 |
| MoRFpred            | 25%                | 26% | 34% | 41% | 45% | 50% | 54% | 59% | 62% | 66% | 69% | 0.6659 |
| SLiMPred            | 33%                | 34% | 45% | 54% | 60% | 65% | 71% | 75% | 78% | 82% | 85% | 0.7802 |
| SLiMPrints          | 29%                | NA  | 0.6209 |
| False Positive Rate | 4.5%               | 5%  | 10% | 15% | 20% | 25% | 30% | 35% | 40% | 45% | 50% |        |

12

13

14 **Supplementary Table 3. Predicted binding regions and matched Eukaryotic Linear Motif (ELM)**  
 15 **pattern in androgen receptor.** The sequence of human androgen receptor was input into EPSLiM and  
 16 ELM database functional site predictor. 16 out of 37 EPSLiM predicted binding regions are fully or  
 17 partially overlapped with at least one ELM pattern.

| EPSLiM                 | Eukaryotic Linear Motif (ELM) |
|------------------------|-------------------------------|
| 2EVQLGLGRVYPRP14       | LIG_SH3_1 (9-15)              |
| 2EVQLGLGRVYPRP14       | LIG_SH3_3 (9-15)              |
| 2EVQLGLGRVYPRP14       | LIG_EVH1_1 (10-15)            |
| 2EVQLGLGRVYPRP14       | LIG_EVH1_1 (11-15)            |
| 2EVQLGLGRVYPRP14       | LIG_SH3_2 (12-17)             |
| 48APPGASLLLQQQQQ63     | LIG_USP7_1 (50-54)            |
| 48APPGASLLLQQQQQ63     | LIG_SUMO_SBM_2 (53-57)        |
| 74QQQQQE79             | LIG_WW_Pin1_4 (78-83)         |
| 100RGPTGYLVLDEE111     | LIG_FHA_1 (101-107)           |
| 100RGPTGYLVLDEE111     | LIG_SH2_STAT5 (105-108)       |
| 100RGPTGYLVLDEE111     | LIG_SUMO_SBM_1 (106-111)      |
| 125PERGCVPEPGA135      | LIG_SH3_3 (127-133)           |
| 141KGLPQQLPAPPDEDDS156 | LIG_CYCLIN_1 (141-144)        |
| 141KGLPQQLPAPPDEDDS156 | LIG_SH3_3 (145-151)           |
| 141KGLPQQLPAPPDEDDS156 | LIG_EVH1_1 (147-151)          |
| 141KGLPQQLPAPPDEDDS156 | LIG_USP7_2 (151-157)          |
| 159P159                | LIG_USP7_1 (157-161)          |
| 162LSLLGPTF169         | LIG_FHA_1 (159-165)           |
| 162LSLLGPTF169         | LIG_SUMO_SBM_2 (160-165)      |
| 162LSLLGPTF169         | LIG_SH3_3 (164-170)           |
| 185EASTMQLLQQQQ197     | LIG_FHA_1 (186-192)           |
| 2330ISDNAKEL237        | LIG_FHA_2 (227-233)           |
| 317GLE319              | LIG_FHA_1 (313-319)           |
| 317GLE319              | LIG_SH2_STAT5 (314-317)       |
| 361DYYNFPLA368         | LIG_SH2_GRB2 (362-365)        |
| 373PPPPPPPPHP381       | LIG_SH3_3 (369-375)           |
| 373PPPPPPPPHP381       | LIG_SH3_3 (370-376)           |
| 373PPPPPPPPHP381       | LIG_SH3_3 (371-377)           |
| 373PPPPPPPPHP381       | LIG_SH3_3 (372-378)           |
| 373PPPPPPPPHP381       | LIG_SH3_3 (373-379)           |
| 373PPPPPPPPHP381       | LIG_SH3_3 (375-381)           |
| 435TLF437              | LIG_FHA_2 (436-442)           |
| 439A439                | LIG_TRAF2_1 (438-441)         |
| 476AVAPYGYTRP485       | LIG_SH2_STAT5 (482-485)       |

18

19 **Supplemental Figures.**

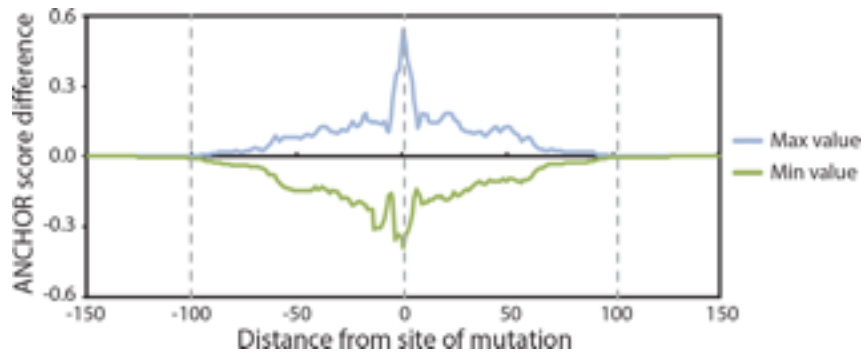

20

21 **Supplemental Figure 1. Distribution of ANCHOR score differences.** Mutations are introduced at each  
22 residue along the disordered regions in Androgen Receptor (AR), then the binding sites are predicted  
23 using ANCHOR. The score for each residue is then compared to the native AR sequence ANCHOR  
24 scores. The max and min value of ANCHOR score differences are shown on the plot. The affect of a  
25 mutation on ANCHOR scores does not extend past 100bp from the mutation site.

26

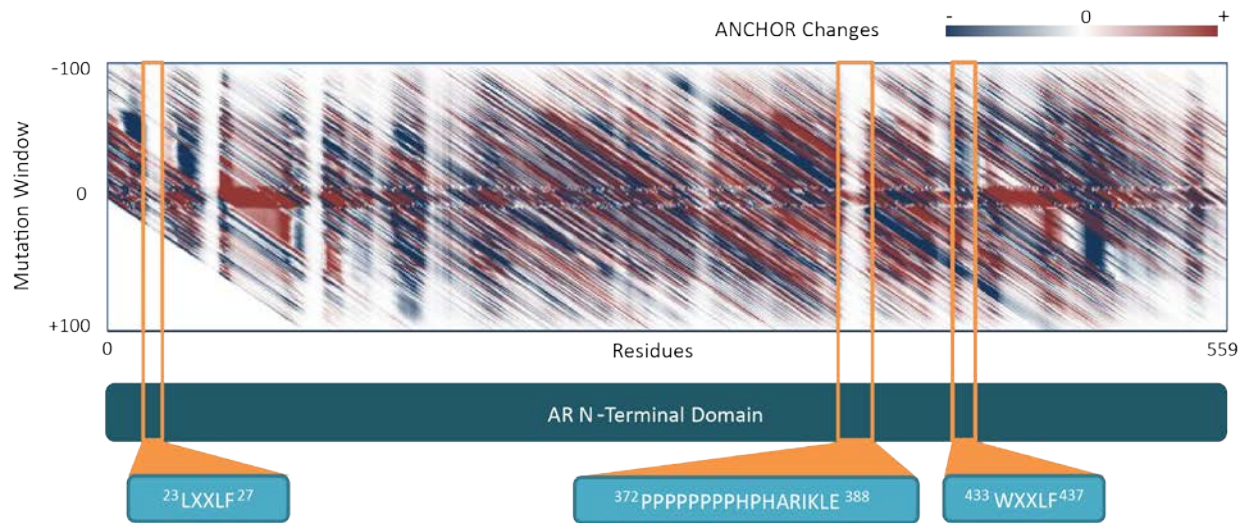

28 **Supplementary Figure 2. Map of ANCHOR score difference for androgen receptor N-terminal**  
 29 **domain.** Each column represents the ANCHOR score differences of a residue induced by a single site  
 30 substitution mutation within a window of 100 residues. The differences in ANCHOR scores are reported  
 31 on a colored scale where blue represents mutations that lead to ANCHOR score decrease and red  
 32 represents mutations that lead to ANCHOR score increase. Robust regions, displayed as white columns,  
 33 are potential SLiM sites; several known motifs are highlighted.

34

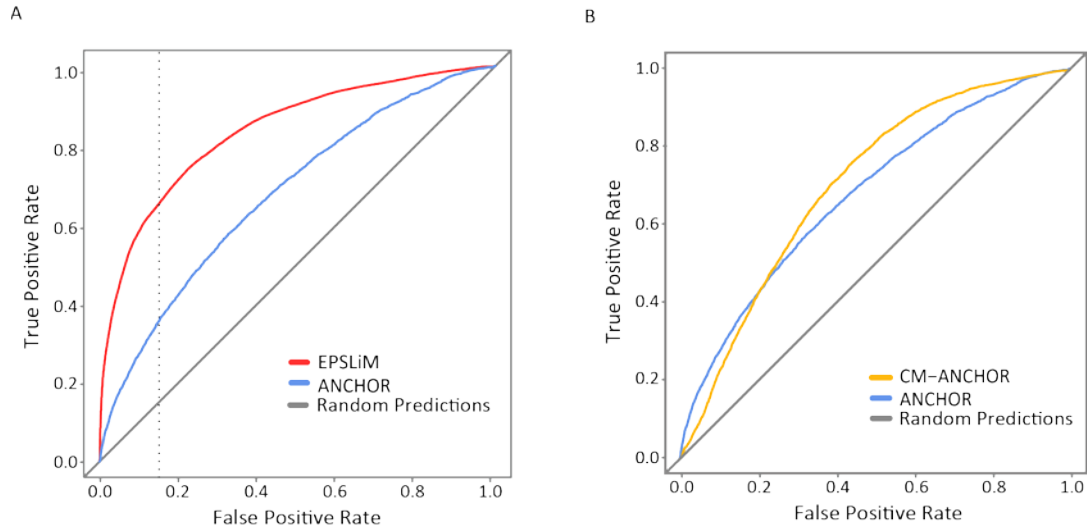

35

36 **Supplemental Fig. 3. Comparative analysis of ANCHOR.** ANCHOR was evaluated by measuring the  
 37 Area Under the Receiver Operating Characteristic (AUROC) Curves and compared with (A) the final  
 38 EPSLiM model and (B) CM-ANCHOR. For EPSLiM, AUROC = 0.8364, while ANCHOR showed a  
 39 much lower performance, AUROC = 0.6764. The dotted gray line represents the 15% false positive rate.  
 40 CM-ANCHOR had an overall better performance, AUROC = 0.7036.

41

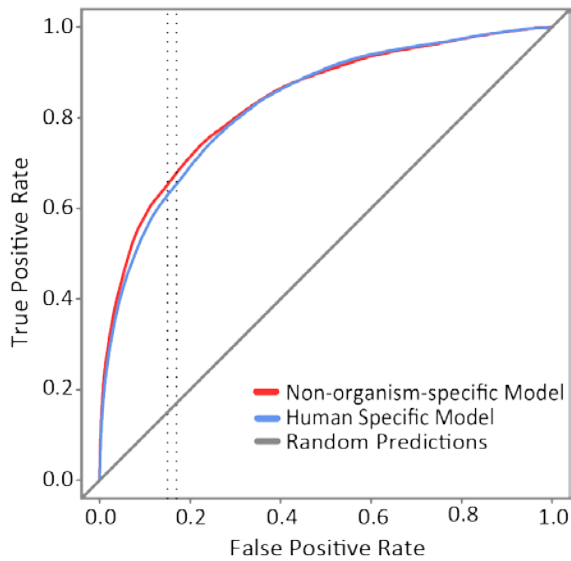

42

43 **Supplementary Figure 4. Performance evaluation for EPSLiM using two different training datasets.**

44 EPSLiM was trained using a human-specific dataset and a non-organism-specific dataset, then evaluated  
 45 by measuring the Area Under the Receiver Operating Characteristic (AUROC) Curves. The non-  
 46 organism-specific model had the slightly better performance, AUROC = 0.8364, comparing with the  
 47 human-specific model, AUROC = 0.8310. The first dotted gray line represents a 15% false positive rate,  
 48 which corresponds to a 65% true positive rate at a threshold of 0.02 for the non-organism-specific model.  
 49 At the same threshold, the second dotted gray line represents the false positive rate (17%) of the human-  
 50 specific model.
